# Supplementary material
Source: publisher figshare collection journal article supplement (https://gsajournals.figshare.com/ndownloader/files/17647229)
Supplement: Supplementary file 1 [file 17647229]

**Supplemental Table S1.** Sequences of primers for 8 polymorphic markers on LG12.

| Marker Name | Location on LG12 (Mbp) | Forward primer | Reverse primer |
| --- | --- | --- | --- |
| Gu617 | 23.49 | TGGAAGCAACAGGAAATCAAGA | AATAAGGCAGCCATTACCGC |
| Gu832 | 24.36 | GGTTTCCCCTCCAGCTGAT | CCAGAGTGTGCCAAGGGATA |
| Gu987 | 24.99 | TGGTAAGAAGGCGACTCAAGA | CCAGGGAGGAGTTACAACCA |
| Gu1052 | 25.25 | GGAAAATCAGTAGCCCAGCA | TTGTCTTGGCTCATCACAGC |
| gu1066 | 25.31 | TTTTGTTGACAGACCGACTGG | GTGTTCATGGGCAGACTGGA |
| Gu1108 | 25.48 | GCTGGGAAAGTCGGAATGTA | AGTTCGGTTCTGGTTCTGGA |
| Gu1150 | 25.65 | CAGCAGATAAGCCTAAAACGAA | CACCCAGCAGCTAATCAAAGA |
| Gu1313 | 26.32 | TAATGAGACGGATGGAGCGT | AAGCTGATCTGACCGGAGAG |
